# Supplementary material for: GOAL ATTAINMENT SCALING IN REHABILITATION: AN EDUCATIONAL REVIEW PROVIDING A COMPREHENSIVE DIDACTICAL TOOL BOX FOR IMPLEMENTING GOAL ATTAINMENT SCALING
Source: PubMed Central journal article supplement — J Rehabil Med. 2023 Jun 14;55:6498. doi: 10.2340/jrm.v55.6498 (PMC10301855; doi:10.2340/jrm.v55.6498), 2023-06-14
Supplement: JRM-55-6498-s1.pdf [file JRM-55-6498-s1.pdf]

Supplementary material has been published as submitted. It has not been copyedited, typeset or checked for scientific content by Journal of Rehabilitation Medicine.

**Table SI.** Examples of application of GAS in Physical Medicine and Rehabilitation domains of practice, research and education.

| PRM field                                      | Use as an outcome measure in research                                                                                                                                                                                                                       | Use across clinical practice with reporting of relevance or feasibility or clinimetric qualities                                                                                                                              | Reviews, position and didactical papers on GAS                      |
|------------------------------------------------|-------------------------------------------------------------------------------------------------------------------------------------------------------------------------------------------------------------------------------------------------------------|-------------------------------------------------------------------------------------------------------------------------------------------------------------------------------------------------------------------------------|---------------------------------------------------------------------|
| Cognitive / behavioural rehabilitation         | Estival et al.(1)<br>Krasny-Pacini et al.(2)<br>Hamzah et al.(3)                                                                                                                                                                                            | Peters et al. (4)<br>Hanssen et al. (5, 6)<br>Grant et al. (7, 8)<br>Rannisto et al. (9)<br>Escher et al. (10)                                                                                                                | Schlosser et al. (11)<br>Malec et al. (12)<br>Bouwens et al. (13)   |
| Spasticity management                          | Ertzgaard et al.(14)<br>Eftekhar et al.(15)                                                                                                                                                                                                                 | Ashford et al. (16, 17)<br>Choi et al. (18)<br>Ghroubi et al. (19)<br>López de Munain et al. (20)<br>Moore et al. 2018 (21)                                                                                                   | Turner-Stokes et al. (22)                                           |
| Other neurological rehabilitation              | Chronic stroke :<br>Hung et al.(23)<br>Peirone et al.(24)<br><br>Neuro-visual rehab :<br>Elshout et al.(25)<br>Bergsma et al. (26)                                                                                                                          | Subacute stroke intensive rehab :<br>Jung et al. (27)<br>Ogawa et al. (28)<br><br>Chronic stroke :<br>Abu Tariah et al. (29)<br><br>Neuro-urology :<br>Brubaker et al. (30)<br><br>Multiple sclerosis :<br>Rannisto et al.(9) |                                                                     |
| Orthopaedic rehabilitation and pain management | Pain management :<br>Oliver et al. (31)                                                                                                                                                                                                                     | Pain management :<br>Zaza et al. (32)<br><br>Orthopaedic rehab :<br>Witjes et al.(33)<br>Rushton et al. (34)                                                                                                                  |                                                                     |
| Geriatric rehabilitation                       | Park et al.(35)<br>Verdoorn et al. (36)<br>van Seben et al. (37)<br>Schnitzler (38)<br>Dolovich et al.(39)                                                                                                                                                  | Herdman et al. (40)<br>Jennings et al.(41)<br>Moorhouse et al.(42)<br>Javadi et al. (43)<br>Stolee et al. (44, 44, 45)                                                                                                        | Reuben et al. (46)                                                  |
| Pediatric rehabilitation                       | Multifaceted programs:<br>Ghorbani et al. (47)<br>Willis et al. (48)<br>Schaaf et al. (49)<br>Velasco et al. (50)<br>Rosenberg et al.(51)<br>Dwyer et al.(52)<br>McLean et al.(53)<br>Ten Berg et al.(54)<br>Chiarello et al.(55)<br>Schwellnus et al. (56) | Multifaceted programs:<br>Bexelius et al. (63)<br>Vroland-Nordstrand et al.(64)<br>Effgen et al. (65)<br>Buitrago 2019 (66)<br>Casey 2017 (67)<br>Ahl et al.(68)<br>Ostensjø et al.(69)<br>Gaffney et al. (70)                | Harpster et al. (73)<br>Calder et al. (74)<br>Steenbeek et al. (75) |

|                                                                                      |                                                                                                                                                                                                                                                                                           |                                                                                                                            |
|--------------------------------------------------------------------------------------|-------------------------------------------------------------------------------------------------------------------------------------------------------------------------------------------------------------------------------------------------------------------------------------------|----------------------------------------------------------------------------------------------------------------------------|
|                                                                                      | <p>Early intervention :<br/>Brown 2017 (57)</p> <p>Spasticity/dystonia management :<br/>Tilton et al. (58)<br/>Bonouvrié et al.(59)</p> <p>Youth or transition:<br/>Kramer et al. (60)<br/>King et al. (61)<br/>Keenan et al. (62)</p>                                                    | <p>Early intervention :<br/>Hwang et al. (71)</p> <p>Spasticity management :<br/>Krasny-Pacini et al.(72)</p>              |
| Education and coaching programs: for caregivers (palliative care), for students (OT) |                                                                                                                                                                                                                                                                                           | <p>Chapleau et al. (76)<br/>Connors et al. (77)<br/>Koski et al. (78)</p> <p>Care giver coaching :<br/>Hui et al. (79)</p> |
| Others                                                                               | <p>General inpatient rehabilitation :<br/>Churilov et al. (80)</p> <p>Drug development :<br/>Mitroui et al. (81)</p> <p>Rural-based ambulatory rehabilitation :<br/>Baggio et al.(82);</p> <p>Chronic conditions (rheumatological, neurological or medical):<br/>Guidetti et al. (83)</p> | <p>Pharmacology:<br/>Vu et al. (84)</p>                                                                                    |

Note: papers cited in this table are not exhaustive; only most relevant examples across PRM fields are presented here.

**Table III.** Useful resources and methods for goal selection prior to setting goals

| <b>Goal Selection Aid</b>                                                                                                                                  | <b>References of papers using this approach prior to creating goal attainment scales</b>                                                                                                                                                      |
|------------------------------------------------------------------------------------------------------------------------------------------------------------|-----------------------------------------------------------------------------------------------------------------------------------------------------------------------------------------------------------------------------------------------|
| <b>INTERVIEWING METHODS – COMMUNICATION METHODS</b>                                                                                                        |                                                                                                                                                                                                                                               |
| Metaphoric identity mapping                                                                                                                                | Ylvisaker et al.(85)                                                                                                                                                                                                                          |
| Motivational interviewing                                                                                                                                  | Rollnick & Miller et al.(86)                                                                                                                                                                                                                  |
| <b>SEMI-STRUCTURED INTERVIEW</b>                                                                                                                           |                                                                                                                                                                                                                                               |
| Canadian Occupational Performance Measures                                                                                                                 | Ghorbani et al. (47); Willis et al. (48); Vroland-Nordstrand et al. (64); King et al. (61); Hui et al. (79); Speth et al. (87); Calder et al. (74); Radomski (88); McLean (53); Mc Pherson et al.(89); Schwelnus et al.(56); Speth et al.(87) |
| Children’s Assessment of Participation and Enjoyment (CAPE) and Preferences for Activities of Children (PAC) (90)                                          | Willis et al. (48)                                                                                                                                                                                                                            |
| Perceived Efficacy and Goal Setting System (PEGS) (91)                                                                                                     | Vroland-Nordstrand et al. (64)                                                                                                                                                                                                                |
| Based on the Life Goal Concept, assessed by the Rivermead Life Goal questionnaire                                                                          | Ogawa et al. (28)                                                                                                                                                                                                                             |
| Routine Based Interview (RBI) (92)                                                                                                                         | Hwang et al. (71)                                                                                                                                                                                                                             |
| Client’s Intervention Priorities (CIP©)                                                                                                                    | Eduardo Cisneros et al. (93)                                                                                                                                                                                                                  |
| <b>QUESTIONNAIRES, STANDARDISED MEASURES</b>                                                                                                               |                                                                                                                                                                                                                                               |
| These tools are intended to better understand client difficulties and to identify therapy goals even if they were not specifically developed for this aim. |                                                                                                                                                                                                                                               |
| Wheelchair Outcome Measure for Young People (WhOM-YP)                                                                                                      | Field & Miller (94)                                                                                                                                                                                                                           |
| Dysexecutive questionnaire from Behavioural Assessment of Dysexecutive syndrome (DEX) (95)                                                                 | Estival et al.(1)                                                                                                                                                                                                                             |
| Pediatric Evaluation of Disability Inventory (PEDI) (96)                                                                                                   | Bexelius et al. (63)                                                                                                                                                                                                                          |
| In Home Occupational Performance Evaluation (I-HOPE) (97)                                                                                                  | Dickson & Toto (98)                                                                                                                                                                                                                           |
| La Trobe Communication Questionnaire (LCQ) (99)                                                                                                            | Finch et al. (100)                                                                                                                                                                                                                            |
| Standardised measures:<br>- Of upper-limb spasticity<br>- Of cognition                                                                                     | Turner-Stokes et al.(101)                                                                                                                                                                                                                     |
| <b>GOALS MENUS</b>                                                                                                                                         |                                                                                                                                                                                                                                               |
| GAS menu for Disorders of Consciousness                                                                                                                    | Turner-Stokes et al. (102)                                                                                                                                                                                                                    |

|                                                                                                                                                                              |                                                                   |
|------------------------------------------------------------------------------------------------------------------------------------------------------------------------------|-------------------------------------------------------------------|
| GAS-eous tool for Upper limb spasticity for spastic persons (Impairments and symptoms domain; Activities and function domain)                                                | Turner-Stokes et al. (103)                                        |
| Finger deformation in older adults persons (4 goals proposed)                                                                                                                | Schnitzler et al. (38)                                            |
| GAS menu for children with dynamic equinus due to cerebral palsy                                                                                                             | Tilton et al. (58)                                                |
| List of goals categorized into four sub-domains (active function, passive function, pain and other) in a pediatric goal-centered upper limb spasticity home exercise program | Shierk et al. (104)                                               |
| List of participation goals for children/youth with cerebral palsy for use in a solution-focused coaching intervention                                                       | Schwelnus et al.(56)                                              |
| List of goals list for spastic paresis, goals mapped on to the WHO ICF                                                                                                       | Turner-Stokes et al.(103); Ashford et al. (105); Choi et al. (18) |
| Goals list provided for Intensive acute stroke rehabilitation, in physical therapy domain and occupational therapy domain.                                                   | Jung et al. (27)                                                  |
| <b>OBSERVATIONS</b>                                                                                                                                                          |                                                                   |
| Joint observation of the patient (mostly the child) between professionals and care givers                                                                                    | Ostensjo et al.(69)                                               |
| Based on visioning video of performance                                                                                                                                      | Behn et al. (106)                                                 |
| <b>OTHER POTENTIAL GOAL SELECTION AIDS NOT BEEN PUBLISHED IN GAS LITERATURE (to our knowledge)</b>                                                                           |                                                                   |
| ABILHAND-Kids; Arnould et al.(107)                                                                                                                                           |                                                                   |
| Outil Thérapeutique d'autodétermination des Objectifs Pédiatriques en Ergothérapie (OThope); Perrault (108)                                                                  |                                                                   |
| COSA (Child Occupational Self-Assessment (COSA); Kramer et al.(109)                                                                                                          |                                                                   |
| Paediatric Activity Card Sort (PACS); Mandich et al. (110)                                                                                                                   |                                                                   |
| Activity Card Sort (ACS); Baum et Edwards (111)                                                                                                                              |                                                                   |

**Table III.** Negative and positive aspects of GAS application

| Negative aspects of GAS                                                                                                                                                                                                                                                                                                                                                                                                                                                                                                                                                                                                                                                                                                                                                                                                                                                                                                                                                                                                                                                                                                                                                                                                                                                                                                                                                                                                                                                                                                                                                                                                                                                                                                                                                                                                                                                                                                                                                                                  |
|----------------------------------------------------------------------------------------------------------------------------------------------------------------------------------------------------------------------------------------------------------------------------------------------------------------------------------------------------------------------------------------------------------------------------------------------------------------------------------------------------------------------------------------------------------------------------------------------------------------------------------------------------------------------------------------------------------------------------------------------------------------------------------------------------------------------------------------------------------------------------------------------------------------------------------------------------------------------------------------------------------------------------------------------------------------------------------------------------------------------------------------------------------------------------------------------------------------------------------------------------------------------------------------------------------------------------------------------------------------------------------------------------------------------------------------------------------------------------------------------------------------------------------------------------------------------------------------------------------------------------------------------------------------------------------------------------------------------------------------------------------------------------------------------------------------------------------------------------------------------------------------------------------------------------------------------------------------------------------------------------------|
| <ul style="list-style-type: none"><li>- Time is needed to create personalized scales, 12 (112) to 49 (75) minutes per scale. To reduce time, GAS may be established by the therapist alone, lacking true collaboration with the person;</li><li>- Experience and expertise is needed to predict GAS levels (27) , and training in GAS writing is recommended (14, 29, 113, 114)</li><li>- Achieving your goal gives you a score of 0! This may be depressing for patients;</li><li>- Cognitive and communication limitations (e.g. aphasia) and lack of insight (e.g. anosognosia) are major challenges for choosing, discussing and formulating realistic goals (115), as well as their attainment (27);</li><li>- If T-scores are used, initial level has to be set on (-2) and leads to floor effect;</li><li>- If T-scores are used parametric interpretation applied to ordinal data is not correct (15);</li><li>- Using GAS as an outcome measure in research requires analysing, correcting, comparing the scales across groups, requiring time and resources (27)</li><li>- Clinimetric qualities are highly dependent on the way GAS scales are written; therefore, clinicians, researchers, and reviewers cannot rely on published studies of metrologic qualities obtained in different studies (75, 114).</li></ul>                                                                                                                                                                                                                                                                                                                                                                                                                                                                                                                                                                                                                                                                         |
| Positive aspects of GAS                                                                                                                                                                                                                                                                                                                                                                                                                                                                                                                                                                                                                                                                                                                                                                                                                                                                                                                                                                                                                                                                                                                                                                                                                                                                                                                                                                                                                                                                                                                                                                                                                                                                                                                                                                                                                                                                                                                                                                                  |
| <ul style="list-style-type: none"><li>- Free to be used by anyone / multidisciplinary tool;</li><li>- GAS is applicable for any goal (20, 58), with the same method applied for many unrelated goals (motor, cognitive, social etc.) Although challenging, growing literature demonstrates feasibility with cognitive impairment (116–118);</li><li>- It covers domains not targeted by standardised measures (20)(119)</li><li>- GAS approach is tailored to the patient’s needs/priorities (18, 27, 82, 103, 120, 121)</li><li>- A partnership approach, including collaborative goal-setting with the patient motivating patients to achieve goals (17, 63, 103, 122–124) promotes therapeutic alliance (4). Patients undergoing rehabilitation are more motivated when goals are clearly defined and consistent with their life project (120);</li><li>- Negotiation of realistic goals avoids potential patient deception regarding rehabilitation results (58);</li><li>- When initially well-defined, GAS demonstrate no ceiling or floor effects (66, 123) and are quick to rate;</li><li>- Clinimetrics: although each goal attainment scale has idiosyncratic clinimetrics, literature has shown that accurately formulated GAS scales may have adequate clinimetric properties:<ul style="list-style-type: none"><li>o Responsiveness (sensitivity to change): 20% of GAS themes are not covered by Gross Motor Function Measure-66 (GMFM-66) or Pediatric Evaluation of Disability Inventory (PEDI)(4, 7, 14, 58, 82, 125) GAS can detect changes that are similar to caregiver reports (126)</li><li>o Content validity (127);</li><li>o Inter-rater reliability may be acceptable if GAS is precisely written (128);</li></ul></li><li>- It facilitates goal-oriented therapy, assists in structuring and focusing intervention (4);</li><li>- GAS use is recognized and recommended in areas of practice (e.g. spasticity management: European consensus statement, 2009 (129).</li></ul> |

## Supplementary references

1. Estival S, Krasny-Pacini A, Laurier V, Maugard C, Thuilleaux D, Postal V. Cognitive Training Targeting Planning Dysfunction in Adults with Prader-Willi Syndrome: Brief Report of a Study Protocol. *Dev Neurorehabilitation* 2019; 22: 569-575.
2. Krasny-Pacini A, Limond J, Evans J, Hiebel J, Bendjelida K, Chevignard M. Context-sensitive goal management training for everyday executive dysfunction in children after severe traumatic brain injury. *J Head Trauma Rehabil* 2014; 29: E49-64.
3. Gould KR, Ponsford JL, Hicks AJ, Hopwood M, Renison B, Feeney TJ. Positive behaviour support for challenging behaviour after acquired brain injury: An introduction to PBS + PLUS and three case studies. *Neuropsychol Rehabil* 2019; 0: 1-35.
4. Trevena-Peters J, McKay A, Ponsford J. Activities of daily living retraining and goal attainment during posttraumatic amnesia. *Neuropsychol Rehabil* 2019; 29: 1655-1670.
5. Hanssen KT, Beiske AG, Landrø NI, Hofoss D, Hessen E. Cognitive rehabilitation in multiple sclerosis: a randomized controlled trial. *Acta Neurol Scand* 2016; 133: 30-40.
6. Hanssen KT, Saltytè Benth J, Beiske AG, Landrø NI, Hessen E. Goal attainment in cognitive rehabilitation in MS patients. *Neuropsychol Rehabil* 2015; 25: 137-154.
7. Grant M, Ponsford J. Goal attainment scaling in brain injury rehabilitation: strengths, limitations and recommendations for future applications. *Neuropsychol Rehabil* 2014; 24: 661-677.
8. Grant M, Ponsford J, Bennett PC. The application of Goal Management Training to aspects of financial management in individuals with traumatic brain injury. *Neuropsychol Rehabil* 2012; 22: 852-873.
9. Rannisto M, Rosti-Otajärvi E, Mäntynen A, Koivisto K, Huhtala H, Hämäläinen P. The use of goal attainment scaling in neuropsychological rehabilitation in multiple sclerosis. *Disabil Rehabil* 2015; 37: 1984-1991.
10. Escher AA, Amlani AM, Viani AM, Berger S. Occupational Therapy in an Intensive Comprehensive Aphasia Program: Performance and Satisfaction Outcomes. *Am J Occup Ther Off Publ Am Occup Ther Assoc* 2018; 72: 7203205110p1-7203205110p7.
11. Schlosser RW. Goal attainment scaling as a clinical measurement technique in communication disorders: a critical review. *J Commun Disord* 2004; 37: 217-239.
12. Malec JF. Goal Attainment Scaling in Rehabilitation. *Neuropsychol Rehabil* 1999; 9: 253-275.
13. Bouwens SFM, van Heugten CM, Verhey FRJ. The practical use of goal attainment scaling for people with acquired brain injury who receive cognitive rehabilitation. *Clin Rehabil* 2009; 23: 310-320.
14. Ertzgaard P, Alwin J, Sörbo A, Lindgren M, Sandsjö L. Evaluation of a self-administered transcutaneous electrical stimulation concept for the treatment of spasticity: a randomized placebo-controlled trial. *Eur J Phys Rehabil Med* 2018; 54: 507-517.
15. Eftekhari P, Mochizuki G, Dutta T, Richardson D, Brooks D. Goal Attainment Scaling in Individuals with Upper Limb Spasticity Post Stroke. *Occup Ther Int* 2016; 23: 379-389.
16. Ashford SA, Nair A, Hancock D, Orridge S, Williams H, Turner-Stokes L. The Leg Activity measure, a new measure of passive and active function and impact on quality of life; informing goal setting and outcome evaluation in leg spasticity. *Disabil Rehabil* 2019; 1-9.
17. Turner-Stokes L, Ashford S, Esquenazi A, Wissel J, Ward AB, Francisco G, et al. A comprehensive person-centered approach to adult spastic paresis: a consensus-based framework. *Eur J Phys Rehabil Med* 2018; 54: 605-617.
18. Choi K, Peters J, Tri A, Chapman E, Sasaki A, Ismail F, et al. Goals Set by Patients Using the *ICF* Model before Receiving Botulinum Injections and Their Relation to Spasticity Distribution. *Physiother Can* 2017; 69: 113-119.
19. Ghroubi S, Alila S, Elleuch W, Ayed HB, Mhiri C, Elleuch MH. Efficacy of botulinum toxin A for the treatment of hemiparesis in adults with chronic upper limb spasticity. *Pan Afr Med J*; 35. Epub ahead of print 25 de febrero de 2020. DOI: 10.11604/pamj.2020.35.55.16091.
20. López de Munain L, Valls-Solé J, Garcia Pascual I, Maisonobe P, on behalf of the VALGAS investigators group. Botulinum Toxin Type A Improves Function According to Goal Attainment in Adults

with Poststroke Lower Limb Spasticity in Real Life Practice. *Eur Neurol* 2019; 82: 1-8.

21. Moore EJ, Olver J, Bryant AL, McKenzie DP, Williams G. Therapy influences goal attainment following botulinum neurotoxin injection for focal spasticity in adults with neurological conditions. *Brain Inj* 2018; 32: 948-956.
22. Turner-Stokes L. Goal attainment scaling (GAS) in rehabilitation: a practical guide. *Clin Rehabil* 2009; 23: 362-370.
23. Hung C-S, Hsieh Y-W, Wu C-Y, Chen Y-J, Lin K-C, Chen C-L, et al. Hybrid Rehabilitation Therapies on Upper-Limb Function and Goal Attainment in Chronic Stroke. *OTJR Occup Particip Health* 2019; 39: 116-123.
24. Peirone E, Gorla PF, Anselmino A. A dual-task home-based rehabilitation programme for improving balance control in patients with acquired brain injury: a single-blind, randomized controlled pilot study. *Clin Rehabil* 2014; 28: 329-338.
25. Elshout JA, Bergsma DP, Sibbel J, Baars-Elsinga A, Lubbers P, Van Asten F, et al. Improvement in activities of daily living after visual training in patients with homonymous visual field defects using Goal Attainment Scaling. *Restor Neurol Neurosci* 2018; 36: 1-12.
26. Bergsma D, Baars-Elsinga A, Sibbel J, Lubbers P, Visser-Meily A. Visual daily functioning of chronic stroke patients assessed by goal attainment scaling after visual restorative training: an explorative study. *Top Stroke Rehabil* 2014; 21: 400-412.
27. Jung Y, Sim J, Park J, Kim J, Kim M. Usefulness of Goal Attainment Scaling in Intensive Stroke Rehabilitation During the Subacute Stage. *Ann Rehabil Med* 2020; 44: 181-194.
28. Ogawa T, Omon K, Yuda T, Ishigaki T, Imai R, Ohmatsu S, et al. Short-term effects of goal-setting focusing on the life goal concept on subjective well-being and treatment engagement in subacute inpatients: a quasi-randomized controlled trial. *Clin Rehabil* 2016; 30: 909-920.
29. Abu Tariah H, Aljehani AS, Alenazi DY, Alturaif DA, Alsarhani MN. Occupational Therapy Goal Achievement for People with Stroke: A Retrospective Study. *Occup Ther Int* 2020; 2020: 1-6.
30. Brubaker L, Khullar V, Piault E, Evans CJ, Bavendam T, Beach J, et al. Goal attainment scaling in patients with lower urinary tract symptoms: development and pilot testing of the Self-Assessment Goal Achievement (SAGA) questionnaire. *Int Urogynecology J* 2011; 22: 937-946.
31. Oliver S, Fisher K, Childs S. What psychological and physical changes predict patients' attainment of personally meaningful goals six months following a CBT based pain management intervention? *Disabil Rehabil* 2017; 39: 2308-2314.
32. Zaza C, Stolee P, Prkachin K. The Application of Goal Attainment Scaling in Chronic Pain Settings. *J Pain Symptom Manage* 1999; 17: 55-64.
33. Witjes S, Hoorntje A, Kuijter PP, Koenraadt KL, Blankevoort L, Kerkhoffs GM, et al. Goal Setting and Achievement in Individualized Rehabilitation of Younger Total and Unicompartmental Knee Arthroplasty Patients: A Cohort Study. *Arch Phys Med Rehabil* 2019; 100: 1434-1441.
34. Rushton PW, Miller WC. Goal attainment scaling in the rehabilitation of patients with lower-extremity amputations: A pilot study. *Arch Phys Med Rehabil* 2002; 83: 771-775.
35. Park Y-H, Moon S-H, Ha J-Y, Lee M-H. The long-term effects of the health coaching self-management program for nursing-home residents. *Clin Interv Aging* 2017; 12: 1079-1088.
36. Verdoorn S, Blom J, Vogelzang T, Kwint H-F, Gusekloo J, Bouvy ML. The use of goal attainment scaling during clinical medication review in older persons with polypharmacy. *Res Soc Adm Pharm* 2019; 15: 1259-1265.
37. van Seben R, Reichardt L, Smorenburg S, Buurman B. Goal-Setting Instruments in Geriatric Rehabilitation: A Systematic Review. *J Frailty Aging* 2017; 6: 37-45.
38. Schnitzler A, Diebold A, Parratte B, Tliba L, Genêt F, Denormandie P. An alternative treatment for contractures of the elderly institutionalized persons: Microinvasive percutaneous needle tenotomy of the finger flexors. *Ann Phys Rehabil Med* 2016; 59: 83-86.
39. Dolovich L, Oliver D, Lamarche L, Agarwal G, Carr T, Chan D, et al. A protocol for a pragmatic randomized controlled trial using the Health Teams Advancing Patient Experience: Strengthening Quality

(Health TAPESTRY) platform approach to promote person-focused primary healthcare for older adults. *Implement Sci* 2016; 11: 49.

40. Herdman KA, Vandermorris S, Davidson S, Au A, Troyer AK. Comparable achievement of client-identified, self-rated goals in intervention and no-intervention groups: reevaluating the use of Goal Attainment Scaling as an outcome measure. *Neuropsychol Rehabil* 2018; 0: 1-11.

41. Jennings LA, Ramirez KD, Hays RD, Wenger NS, Reuben DB. Personalized Goal Attainment in Dementia Care: Measuring What Persons with Dementia and Their Caregivers Want. *J Am Geriatr Soc* 2018; 66: 2120-2127.

42. Moorhouse P, Theou O, Fay S, McMillan M, Moffatt H, Rockwood K. Treatment in a Geriatric Day Hospital improve individualized outcome measures using Goal Attainment Scaling. *BMC Geriatr* 2017; 17: 9.

43. Javadi D, Lamarche L, Avilla E, Siddiqui R, Gaber J, Bhamani M, et al. Feasibility study of goal setting discussions between older adults and volunteers facilitated by an eHealth application: development of the Health TAPESTRY approach. *Pilot Feasibility Stud* 2018; 4: 184.

44. Stolee P, Awad M, Byrne K, Deforge R, Clements S, Glenny C. A multi-site study of the feasibility and clinical utility of Goal Attainment Scaling in geriatric day hospitals. *Disabil Rehabil* 2012; 34: 1716-1726.

45. Stolee P, Rockwood K, Fox RA, Streiner DL. The use of goal attainment scaling in a geriatric care setting. *J Am Geriatr Soc* 1992; 40: 574-578.

46. Reuben DB, Jennings LA. Putting Goal-Oriented Patient Care Into Practice. *J Am Geriatr Soc* 2019; 67: 1342-1344.

47. Ghorbani N, Rassafiani M, Izadi-Najafabadi S, Yazdani F, Akbarfahimi N, Havaei N, et al. Effectiveness of cognitive orientation to (daily) occupational performance (CO-OP) on children with cerebral palsy: A mixed design. *Res Dev Disabil* 2017; 71: 24-34.

48. Willis C, Nyquist A, Jahnsen R, Elliott C, Ullenhag A. Enabling physical activity participation for children and youth with disabilities following a goal-directed, family-centred intervention. *Res Dev Disabil* 2018; 77: 30-39.

49. Schaaf RC, Dumont RL, Arbesman M, May-Benson TA. Efficacy of Occupational Therapy Using Ayres Sensory Integration®: A Systematic Review. *Am J Occup Ther Off Publ Am Occup Ther Assoc* 2018; 72: 7201190010p1-7201190010p10.

50. Velasco MA, Raya R, Muzzioli L, Morelli D, Otero A, Iosa M, et al. Evaluation of cervical posture improvement of children with cerebral palsy after physical therapy based on head movements and serious games. *Biomed Eng Online* 2017; 16: 74.

51. Rosenberg L, Maeir A, Gilboa Y. Feasibility Study of a Therapeutic Mobility Summer Camp for Children with Severe Cerebral Palsy: Power Fun. *Phys Occup Ther Pediatr* 2020; 40: 395-409.

52. Dwyer JB, Bloch MH. Antidepressants for Pediatric Patients. *Curr Psychiatry* 2019; 18: 26- 42F.

53. McLean B, Taylor S, Blair E, Valentine J, Carey L, Elliott C. Somatosensory Discrimination Intervention Improves Body Position Sense and Motor Performance in Children With Hemiplegic Cerebral Palsy. *Am J Occup Ther* 2017; 71: 7103190060p1.

54. Ten Berge SR, Boonstra AM, Dijkstra PU, Hadders-Algra M, Haga N, Maathuis CGB. A systematic evaluation of the effect of thumb opponens splints on hand function in children with unilateral spastic cerebral palsy. *Clin Rehabil* 2012; 26: 362-371.

55. Chiarello LA, Palisano RJ, Avery L, Hanna S, On Track Study Team. Longitudinal Trajectories and Reference Percentiles for Participation in Family and Recreational Activities of Children with Cerebral Palsy. *Phys Occup Ther Pediatr* 2021; 41: 18-37.

56. Schwellnus H, King G, Baldwin P, Keenan S, Hartman LR. A Solution-Focused Coaching Intervention with Children and Youth with Cerebral Palsy to Achieve Participation-Oriented Goals. *Phys Occup Ther Pediatr* 2020; 40: 423-440.

57. Brown L, Burns YR, Watter P, Gray PH. Goal Attainment Scaling to Evaluate Intervention on Individual Gains for Children Born Extremely Preterm. *Pediatr Phys Ther Off Publ Sect Pediatr Am Phys Ther Assoc* 2017; 29: 215-221.

58. Tilton A, Russman B, Aydin R, Dincer U, Escobar RG, Kutlay S, et al. AbobotulinumtoxinA



- (Dysport®) Improves Function According to Goal Attainment in Children With Dynamic Equinus Due to Cerebral Palsy. *J Child Neurol* 2017; 32: 482-487.
59. Bonouvrié LA, Becher JG, Vles JSH, Vermeulen RJ, Buizer AI, IDYS Study Group. The Effect of Intrathecal Baclofen in Dyskinetic Cerebral Palsy: The IDYS Trial. *Ann Neurol* 2019; 86: 79-90.
60. Kramer JM, Helfrich C, Levin M, Hwang I-T, Samuel PS, Carrellas A, et al. Initial evaluation of the effects of an environmental-focused problem-solving intervention for transition-age young people with developmental disabilities: Project TEAM. *Dev Med Child Neurol* 2018; 60: 801-809.
61. King G, Keenan S, McDougall C, Oake M. Investigating a Participation-Based Friendship Intervention for Youth with Disabilities: Effects on Goal Attainment, Social Self-Efficacy, and Engagement. *Phys Occup Ther Pediatr* 2020; 40: 152-167.
62. Keenan S, King G, Curran CJ, McPherson A. Effectiveness of experiential life skills coaching for youth with a disability. *Phys Occup Ther Pediatr* 2014; 34: 119-131.
63. Bexelius A, Carlberg EB, Löwing K. Quality of goal setting in pediatric rehabilitation-A SMART approach. *Child Care Health Dev* 2018; 44: 850-856.
64. Vroland-Nordstrand K, Eliasson A-C, Jacobsson H, Johansson U, Krumlinde-Sundholm L. Can children identify and achieve goals for intervention? A randomized trial comparing two goal-setting approaches. *Dev Med Child Neurol* 2016; 58: 589-596.
65. Effgen SK, McCoy SW, Chiarello LA, Jeffries LM, Bush H. Physical Therapy-Related Child Outcomes in School: An Example of Practice-Based Evidence Methodology. *Pediatr Phys Ther Off Publ Sect Pediatr Am Phys Ther Assoc* 2016; 28: 47-56.
66. Buitrago JA, Bolaños AM, Caicedo Bravo E. A motor learning therapeutic intervention for a child with cerebral palsy through a social assistive robot. *Disabil Rehabil Assist Technol* 2019; 15: 357-362.
67. Casey AF, Pickard V, Ullrich C, MacNeil Z. An adapted walking intervention for a child with Pitt Hopkins syndrome. *Disabil Rehabil Assist Technol* 2017; 13: 25-30.
68. Ahl LE, Johansson E, Granat T, Carlberg EB. Functional therapy for children with cerebral palsy: an ecological approach. *Dev Med Child Neurol* 2005; 47: 613-619.
69. Ostensjø S, Oien I, Fallang B. Goal-oriented rehabilitation of preschoolers with cerebral palsy--a multi-case study of combined use of the Canadian Occupational Performance Measure (COPM) and the Goal Attainment Scaling (GAS). *Dev Neurorehabilitation* 2008; 11: 252-259.
70. Gaffney E, Gaffney K, Bartleson L, Dodds C. Goal Attainment Scaling Made Easy With an App: GOALed. *Pediatr Phys Ther Off Publ Sect Pediatr Am Phys Ther Assoc* 2019; 31: 225-230.
71. Hwang A-W, Chao M-Y, Liu S-W. A randomized controlled trial of routines-based early intervention for children with or at risk for developmental delay. *Res Dev Disabil* 2013; 34: 3112-3123.
72. Krasny-Pacini A, Pauly F, Hiebel J, Godon S, Isner-Horobeti M-E, Chevignard M. Feasibility of a shorter Goal Attainment Scaling method for a pediatric spasticity clinic - The 3-milestones GAS. *Ann Phys Rehabil Med* 2017; 60: 249-257.
73. Harpster K, Sheehan A, Foster EA, Leffler E, Schwab SM, Angeli JM. The methodological application of goal attainment scaling in pediatric rehabilitation research: a systematic review. *Disabil Rehabil* 2018; 1-10.
74. Calder S, Ward R, Jones M, Johnston J, Claessen M. The uses of outcome measures within multidisciplinary early childhood intervention services: a systematic review. *Disabil Rehabil* 2018; 40: 2599-2622.
75. Steenbeek D, Ketelaar M, Galama K, Gorter JW. Goal attainment scaling in paediatric rehabilitation: a critical review of the literature. *Dev Med Child Neurol* 2007; 49: 550-556.
76. Chapleau A, Harrison J. Fieldwork I Program Evaluation of Student Learning Using Goal Attainment Scaling. *Am J Occup Ther Off Publ Am Occup Ther Assoc* 2015; 69 Suppl 2: 6912185060p1-8.
77. Connors HB, Skiba DJ, Jeffries PR, Rizzolo MA, Billings DM. Health Information Technology Scholars Program: From Implementation to Outcomes. *Nurs Educ Perspect* 2017; 38: 3-8.
78. Koski J, Richards LG. Reliability and Sensitivity to Change of Goal Attainment Scaling in Occupational Therapy Nonclassroom Educational Experiences. *Am J Occup Ther* 2015; 69: 6912350030p1-6912350030p5.
79. Hui C, Snider L, Couture M. Self-regulation workshop and Occupational Performance Coaching with

teachers: A pilot study: Étude pilote sur un atelier d'autogestion et des séances d'encadrement du rendement occupationnel à l'intention des enseignants. *Can J Occup Ther*. Epub ahead of print 29 de marzo de 2016. DOI: 10.1177/0008417415627665.

80. Churilov I, Brock K, Churilov JM, Sutton E, Murphy D, MacIsaac RJ, et al. Goal attainment scaling outcomes in general inpatient rehabilitation: association with functional independence and perceived goal importance and difficulty. *J Rehabil Med* 2020; 52: jrm00054.

81. Mitroiu M, Oude Rengerink K, Pontes C, Sancho A, Vives R, Pesiou S, et al. Applicability and added value of novel methods to improve drug development in rare diseases. *Orphanet J Rare Dis* 2018; 13: 200.

82. Baggio L, Buckley DJ. Detecting change in patient outcomes in a rural ambulatory rehabilitation service: the responsiveness of Goal Attainment Scaling and the Lawton Scale. *Aust Health Rev Publ Aust Hosp Assoc* 2016; 40: 63-68.

83. Guidetti S, Nielsen KT, von Bülow C, Pilegaard MS, Klokke L, Wæhrens EE. Evaluation of an intervention programme addressing ability to perform activities of daily living among persons with chronic conditions: study protocol for a feasibility trial (ABLE). *BMJ Open* 2018; 8: e020812.

84. Vu M, Law AV. Goal-attainment scaling: a review and applications to pharmacy practice. *Res Soc Adm Pharm RSAP* 2012; 8: 102-121.

85. Ylvisaker M, McPherson K, Kayes N, Pellett E. Metaphoric identity mapping: facilitating goal setting and engagement in rehabilitation after traumatic brain injury. *Neuropsychol Rehabil* 2008; 18: 713-741.

86. William MR, Rollnick S. *Motivational Interviewing, Third Edition: Helping People Change*. 3e édition. New York, NY: Guilford Press, 2012.

87. Speth L, Janssen-Potten Y, Rameckers E, Defesche A, Winkens B, Becher J, et al. Effects of botulinum toxin A and/or bimanual task-oriented therapy on upper extremity activities in unilateral Cerebral Palsy: a clinical trial. *BMC Neurol* 2015; 15: 143.

88. Radomski MV, Giles G, Finkelstein M, Owens J, Showers M, Zola J. Implementation Intentions for Self-Selected Occupational Therapy Goals: Two Case Reports. *Am J Occup Ther* 2018; 72: 7203345030p1-7203345030p6.

89. McPherson AC, McAdam L, Keenan S, Schweltnus H, Biddiss E, DeFinney A, et al. A feasibility study using solution-focused coaching for health promotion in children and young people with Duchenne muscular dystrophy. *Dev Neurorehabilitation* 2018; 21: 121-130.

90. King G, Law M, King S, Hurley P, Hanna S, Kertoy S, et al. *Children's Assessment of Participation and Enjoyment (CAPE) and Preferences for Activities of Children (PAC)*. San Antonio, TX: Harcourt Assessment, 2004.

91. Missiuna C, Pollock N, Law M, Walter S, Cavey N. Examination of the Perceived Efficacy and Goal Setting System (PEGS) With Children With Disabilities, Their Parents, and Teachers. *Am J Occup Ther* 2006; 60: 204-214.

92. McWilliam RA, Casey AM, Sims J. The Routines-Based Interview: A Method for Gathering Information and Assessing Needs. *Infants Young Child* 2009; 22: 224-233.

93. Cisneros E, Moreno A, Léveillé G, Charette G, Guerrette M-C, McKerral M. The Client's Intervention Priorities (CIP)©: A person-centered tool to support goal setting during interdisciplinary neurorehabilitation. *Cogent Psychol* 2019; 6: 1603614.

94. Field DA, Miller WC. The Wheelchair Outcome Measure for Young People (WhOM-YP): modification and metrics for children and youth with mobility limitations. *Disabil Rehabil Assist Technol* 2020; 1-9.

95. Baron IS. Behavioural Assessment of the Dysexecutive Syndrome for Children (BADS-C) by Emslie, H., Wilson, F. C., Burden, V., Nimmo-Smith, I., & Wilson, B. A. (2003). *Child Neuropsychol* 2007; 13: 539-542.

96. Haley SM, Coster WJ, Ludlow LH, Haltiwanger JT, Andrellos PJ. *Pediatric evaluation of disability inventory: Development, standardization, and administration manual, version 1.0*. 1992.

97. Keglovits M, Somerville E, Stark S. In-Home Occupational Performance Evaluation for Providing Assistance (I-HOPE Assist): An Assessment for Informal Caregivers. *Am J Occup Ther* 2015; 69: 6905290010p1-6905290010p9.

98. Dickson KL, Toto PE. Feasibility of Integrating Occupational Therapy Into a Care Coordination Program for Aging in Place. *Am J Occup Ther Off Publ Am Occup Ther Assoc* 2018; 72: 7204195020p1-7204195020p7.
99. Douglas JM, Bracy CA, Snow PC. Measuring perceived communicative ability after traumatic brain injury: reliability and validity of the La Trobe Communication Questionnaire. *J Head Trauma Rehabil* 2007; 22: 31-38.
100. Finch E, Cornwell P, Copley A, Doig E, Fleming J. Remediation of social communication impairments following traumatic brain injury using metacognitive strategy intervention: a pilot study. *Brain Inj* 2017; 31: 1830-1839.
101. Ashford S, Turner-Stokes L. Goal attainment for spasticity management using botulinum toxin. *Physiother Res Int J Res Clin Phys Ther* 2006; 11: 24-34.
102. Turner-Stokes L, Rose H, Lakra C, Williams H, Ashford SA, Siegert RJ. Goal-setting and attainment in prolonged disorders of consciousness – development of a structured approach. *Brain Inj* 2020; 34: 78-88.
103. Turner-Stokes L, Ashford S, Jacinto J, Maisonobe P, Balcaitiene J, Fheodoroff K. Impact of integrated upper limb spasticity management including botulinum toxin A on patient-centred goal attainment: rationale and protocol for an international prospective, longitudinal cohort study (ULIS-III). *BMJ Open* 2016; 6: e011157.
104. Shierk A, Jiménez-Moreno AC, Roberts H, Ackerman-Laufer S, Backer G, Bard-Pondarre R, et al. Development of a Pediatric Goal-Centered Upper Limb Spasticity Home Exercise Therapy Program for Use in a Phase-III Trial of Abobotulinumtoxin A (Dysport®). *Phys Occup Ther Pediatr* 2019; 39: 124-135.
105. Ashford S, Williams H, Nair A, Orridge S, Turner-Stokes L. Categorisation of goals set using Goal Attainment Scaling for treatment of leg spasticity: a multicentre analysis. *Disabil Rehabil* 2018; 41: 1925-1930.
106. Behn N, Marshall J, Togher L, Cruice M. Setting and achieving individualized social communication goals for people with acquired brain injury (ABI) within a group treatment. *Int J Lang Commun Disord*. Epub ahead of print 28 de junio de 2019. DOI: 10.1111/1460-6984.12488.
107. Arnould C, Penta M, Renders A, Thonnard J-L. ABILHAND-Kids: a measure of manual ability in children with cerebral palsy. *Neurology* 2004; 63: 1045-1052.
108. Perrault A. CO-OP et scolarité: Intérêt de l'approche et de la méthode CO-OP pour les ergothérapeutes accompagnant des enfants présentant un trouble développemental de la coordination: application à l'utilisation d'outils scolaires. *Ergothérapies*. *Ergothérapies* 2017; HS: 5-40.
109. Kramer JM, Kielhofner G, Smith EV. Validity evidence for the Child Occupational Self Assessment. *Am J Occup Ther Off Publ Am Occup Ther Assoc* 2010; 64: 621-632.
110. Mandich A, Polatajko HJ, Miller L, Baum C. Paediatric Activity Card Sort (PACS).
111. Baum CM, Edwards D. ACS: activity card sort. 2nd ed. Bethesda, Md: AOTA Press, American Occupational Therapy Association, 2008.
112. Cusick A, McIntyre S, Novak I, Lannin N, Lowe K. A comparison of goal attainment scaling and the Canadian occupational performance measure for paediatric rehabilitation research. *Dev Neurorehabilitation* 2006; 9: 149-157.
113. Bovend'Eerd TJ, Botell RE, Wade DT. Writing SMART rehabilitation goals and achieving goal attainment scaling: a practical guide. *Clin Rehabil* 2009; 23: 352-361.
114. Krasny-Pacini A, Evans J, Sohlberg MM, Chevignard M. Proposed Criteria for Appraising Goal Attainment Scales Used as Outcome Measures in Rehabilitation Research. *Arch Phys Med Rehabil* 2016; 97: 157-170.
115. Vluggen TPMM, van Haastregt JCM, Verbunt JA, van Heugten CM, Schols JMGA. Feasibility of an integrated multidisciplinary geriatric rehabilitation programme for older stroke patients: a process evaluation. *BMC Neurol* 2020; 20: 219.
116. Sherratt S, Worrall L, Pearson C, Howe T, Hersh D, Davidson B. «Well it has to be language-related»: speech-language pathologists' goals for people with aphasia and their families. *Int J Speech Lang Pathol* 2011; 13: 317-328.
117. Hersh D, Worrall L, Howe T, Sherratt S, Davidson B. SMARTER goal setting in aphasia rehabilitation.

Aphasiology 2012; 26: 220-233.

118. Worrall L, Sherratt S, Rogers P, Howe T, Hersh D, Ferguson A, et al. What people with aphasia want: Their goals according to the ICF. *Aphasiology* 2011; 25: 309-322.
119. Steenbeek D, Meester-Delver A, Becher JG, Lankhorst GJ. The effect of botulinum toxin type A treatment of the lower extremity on the level of functional abilities in children with cerebral palsy: evaluation with goal attainment scaling. *Clin Rehabil* 2005; 19: 274-282.
120. López de Munain L, Valls-Solé J, Garcia Pascual I, Maisonobe P, on behalf of the VALGAS investigators group. Botulinum Toxin Type A Improves Function According to Goal Attainment in Adults with Poststroke Lower Limb Spasticity in Real Life Practice. *Eur Neurol* 2019; 82: 1-8.
121. Krasny-Pacini A, Hiebel J, Pauly F, Godon S, Chevignard M. Goal Attainment Scaling in rehabilitation: A literature-based update. *Ann Phys Rehabil Med* 2013; 56: 212-230.
122. Jung Y, Sim J, Park J, Kim J, Kim M. Usefulness of Goal Attainment Scaling in Intensive Stroke Rehabilitation During the Subacute Stage. *Ann Rehabil Med* 2020; 44: 181-194.
123. Eftekhar P, Mochizuki G, Dutta T, Richardson D, Brooks D. Goal Attainment Scaling in Individuals with Upper Limb Spasticity Post Stroke. *Occup Ther Int* 2016; 23: 379-389.
124. Sugavanam T, Mead G, Bulley C, Donaghy M, van Wijck F. The effects and experiences of goal setting in stroke rehabilitation - a systematic review. *Disabil Rehabil* 2013; 35: 177-190.
125. Steenbeek D, Gorter JW, Ketelaar M, Galama K, Lindeman E. Responsiveness of Goal Attainment Scaling in comparison to two standardized measures in outcome evaluation of children with cerebral palsy. *Clin Rehabil* 2011; 25: 1128-1139.
126. Kraft KA, Weisberg J, Finch MD, Nickel A, Griffin KH, Barnes TL. Hippotherapy in Rehabilitation Care for Children With Neurological Impairments and Developmental Delays: A Case Series. *Pediatr Phys Ther Off Publ Sect Pediatr Am Phys Ther Assoc* 2019; 31: E14-E21.
127. Palisano RJ. Validity of goal attainment scaling in infants with motor delays. *Phys Ther* 1993; 73: 651-658; discussion 658-660.
128. Steenbeek D, Ketelaar M, Lindeman E, Galama K, Gorter JW. Interrater reliability of goal attainment scaling in rehabilitation of children with cerebral palsy. *Arch Phys Med Rehabil* 2010; 91: 429-435.
129. Wissel J, Ward AB, Erztgaard P, Bensmail D, Hecht MJ, Lejeune TM, et al. European consensus table on the use of botulinum toxin type A in adult spasticity. *J Rehabil Med* 2009; 41: 13-25.
